# Supplementary material for: Integrative analysis of clinicopathological features defines novel prognostic models for mantle cell lymphoma in the immunochemotherapy era: a report from The North American Mantle Cell Lymphoma Consortium
Source: PubMed Central journal article supplement (PMC10725579; doi:10.1186/s13045-023-01520-7), 2023-12-16

**Supplementary Table S1. Summary of Univariate Analysis**

| Parameters             | <i>P value</i>  |                 | Parameters                      | <i>P value</i>  |                | Parameters             | <i>P value</i>  |                 |
|------------------------|-----------------|-----------------|---------------------------------|-----------------|----------------|------------------------|-----------------|-----------------|
|                        | OS              | PFS             |                                 | OS              | PFS            |                        | OS              | PFS             |
|                        |                 |                 | <b>AAS</b>                      | <b>0.0016</b>   | <b>0.00072</b> | <b>Clonal Serum Ig</b> | <b>0.148</b>    | <b>0.0298</b>   |
| <b>Age</b>             | <b>1.57E-15</b> | <b>1.32E-10</b> | Older Cohort                    | 0.330           | 0.154          | Older Cohort           | 0.925           | 0.120           |
|                        |                 |                 | Younger Cohort                  | 0.0116          | 0.00778        | Younger Cohort         | 0.261           | 0.647           |
| <b>Gender</b>          | <b>0.395</b>    | <b>0.335</b>    | <b>Extranodal site involved</b> | <b>0.390</b>    | <b>0.525</b>   | <b>WBCs</b>            | <b>0.000201</b> | <b>0.287</b>    |
| Older Cohort           | 0.482           | 0.224           | Older Cohort                    | 0.0944          | 0.330          | Older Cohort           | 0.0286          | 0.806           |
| Younger Cohort         | 0.462           | 0.567           | Younger Cohort                  | 0.966           | 0.521          | Younger Cohort         | 0.00334         | 0.501           |
| <b>Race</b>            | <b>0.466</b>    | <b>0.831</b>    | <b>Limited to one site</b>      | <b>0.00366</b>  | <b>0.0102</b>  | <b>Neutrophils</b>     | <b>0.0147</b>   | <b>0.0426</b>   |
| Older Cohort           | 0.711           | 0.676           | Older Cohort                    | 0.220           | 0.534          | Older Cohort           | 0.0958          | 0.109           |
| Younger Cohort         | 0.437           | 0.630           | Younger Cohort                  | 0.0277          | 0.0209         | Younger Cohort         | 0.315           | 0.491           |
| <b>Performance</b>     | <b>1.30E-10</b> | <b>1.23E-05</b> | <b>Circulating tumor cells</b>  | <b>4.89E-05</b> | <b>0.00915</b> | <b>Lymphocytes</b>     | <b>0.00431</b>  | <b>0.957</b>    |
| Older Cohort           | 1.47E-06        | 0.00325         | Older Cohort                    | 0.00683         | 0.0817         | Older Cohort           | 0.192           | 0.798           |
| Younger Cohort         | 0.0189          | 0.0425          | Younger Cohort                  | 0.00132         | 0.122          | Younger Cohort         | 0.00666         | 0.712           |
| <b>Tonsil involved</b> | <b>0.114</b>    | <b>0.733</b>    | <b>Largest diameter</b>         | <b>0.0367</b>   | <b>0.677</b>   | <b>Anemia</b>          | <b>2.69E-06</b> | <b>2.14E-05</b> |
| Older Cohort           | 0.762           | 0.906           | Older Cohort                    | 0.735           | 0.900          | Older Cohort           | 0.00128         | 0.0363          |
| Younger Cohort         | 0.200           | 0.883           | Younger Cohort                  | 0.0169          | 0.623          | Younger Cohort         | 0.00364         | 0.00138         |
| <b>Colon involved</b>  | <b>0.00788</b>  | <b>0.711</b>    | <b>R maintenance</b>            | <b>0.0045</b>   | <b>0.00832</b> | <b>Platelets</b>       | <b>3.16E-05</b> | <b>0.00225</b>  |
| Older Cohort           | 0.0993          | 0.240           | Older Cohort                    | 0.000313        | 0.00352        | Older Cohort           | 0.00258         | 0.0215          |
| Younger Cohort         | 0.0554          | 0.476           | Younger Cohort                  | 0.625           | 0.436          | Younger Cohort         | 0.00166         | 0.0765          |

|                                 |                 |                 |                               |                 |                 |                               |                 |                |
|---------------------------------|-----------------|-----------------|-------------------------------|-----------------|-----------------|-------------------------------|-----------------|----------------|
| <b>Liver involved</b>           | <b>0.0606</b>   | <b>0.00296</b>  | <b>Anthracycline-based vs</b> |                 |                 | <b>CD23</b>                   | <b>0.0414</b>   | <b>0.881</b>   |
| Older Cohort                    | 0.206           | 0.00964         | <b>Cytarabine-based</b>       | <b>0.002823</b> | <b>1.44E-05</b> | <b>Older Cohort</b>           | <b>0.540</b>    | <b>0.309</b>   |
| Younger Cohort                  | 0.022           | 0.00764         | Older Cohort                  | 0.345           | 0.44615         | <b>Younger Cohort</b>         | <b>0.00304</b>  | <b>0.314</b>   |
|                                 |                 |                 | Younger Cohort                | 0.254           | 0.000297        |                               |                 |                |
| <b>Small intestine involved</b> | <b>0.436</b>    | <b>0.377</b>    | <b>HSCT</b>                   | <b>4.75E-12</b> | <b>5.03E-11</b> | <b>Diffuse growth pattern</b> | <b>0.000755</b> | <b>0.00343</b> |
| Older Cohort                    | 0.532           | 0.325           | Older Cohort                  | 0.000485        | 0.00179         | Older Cohort                  | 0.000937        | 0.00486        |
| Younger Cohort                  | 0.896           | 0.973           | Younger Cohort                | 0.00152         | 0.000337        | Younger Cohort                | 0.478           | 0.242          |
| <b>Spleen involved</b>          | <b>1.46E-06</b> | <b>0.0143</b>   | <b>Auto vs Allo HSCT</b>      | <b>0.064</b>    | <b>0.0196</b>   | <b>Cytology</b>               | <b>0.00864</b>  | <b>0.0918</b>  |
| Older Cohort                    | 0.0176          | 0.452           | Older Cohort                  | 0.193           | 0.592           | Older Cohort                  | 0.425           | 0.137          |
| Younger Cohort                  | 2.76E-05        | 0.0567          | Younger Cohort                | 0.0895          | 0.0182          | Younger Cohort                | 0.0175          | 0.966          |
| <b>Stomach involved</b>         | <b>0.366</b>    | <b>0.535</b>    | <b>Elevated LDH</b>           | <b>2.19E-05</b> | <b>0.0243</b>   | <b>P53 expression</b>         | <b>1.84E-09</b> | <b>0.00214</b> |
| Older Cohort                    | 0.767           | 0.481           | Older Cohort                  | 0.0119          | 0.110           | Older Cohort                  | 8.49E-06        | 0.00713        |
| Younger Cohort                  | 0.451           | 0.940           | Younger Cohort                | 0.000636        | 0.213           | Younger Cohort                | 0.000706        | 0.178          |
| <b>Digestive tract involved</b> | <b>0.0167</b>   | <b>0.308</b>    | <b>Elevated Beta-MG</b>       | <b>0.00877</b>  | <b>0.0714</b>   | <b>Ki67</b>                   | <b>8.36E-05</b> | <b>0.00625</b> |
| Older Cohort                    | 0.118           | 0.142           | Older Cohort                  | 0.264           | 0.636           | Older Cohort                  | 0.0237          | 0.0305         |
| Younger Cohort                  | 0.118           | 0.936           | Younger Cohort                | 0.0094          | 0.0881          | Younger Cohort                | 0.00414         | 0.170          |
| <b>B Symptoms</b>               | <b>2.40E-07</b> | <b>3.99E-07</b> | <b>CD5</b>                    | <b>0.0518</b>   | <b>0.955</b>    | <b>SOX11</b>                  | <b>0.00262</b>  | <b>0.0388</b>  |
| Older Cohort                    | 0.0228          | 0.140           | Older Cohort                  | 0.314           | 0.785           | Older Cohort                  | 0.135           | 0.129          |
| Younger Cohort                  | 9.12E-06        | 8.86E-07        | Younger Cohort                | 0.0945          | 0.496           | Younger Cohort                | 0.00762         | 0.148          |

Abbreviation: AAS, Ann Arbor stage, Beta-MG, beta-microglobulin; LDH, lactate dehydrogenase; SCT, stem cell transplantation; WBC, white blood cell.

## **Supplementary Figure Legends:**

**Supplementary Figure S1: The age distribution of the analytic cohort of MCL patients.**

**Supplementary Figure S2: Chemotherapy regimens and outcomes.** The cases were divided into four groups according to chemotherapy regimens: anthracycline-based, cytarabine-based, purine analogue-based, and others. The OS and PFS of the entire cohort (A and B), the older cohort (C and D), and the younger cohort (E and F) are respectively shown.

**Supplementary Figure S3: Impact of HSCT on survival.** Comparison of the OS and PFS between patients treated with or without HSCT in the entire cohort (A and B), the older cohort (C and D), and the younger cohort (E and F).

**Supplementary Figure S4: Impact of HSCT on the survival of the patients with blastoid/pleomorphic variant.** Comparison of OS (A) and PFS (B) between patients with the blastoid/pleomorphic variant who received HSCT or not.

**Supplementary Figure S5: The p53-IHC analysis in the MCL cases.** (A-D) The various intensity of p53-IHC staining is shown: (A) negative staining; (B) weak and scattered intermediate positivity; (C) a mix of intermediate and strong positivity; and (D) strong positivity. The OS and PFS were compared between patients with positive and negative p53 in the entire cohort (E), the older cohort (F), and the younger cohort (G), respectively.

**Supplementary Figure S6. The MIPI and MIPI-c stratification for the analytic cohort of cases.** The OS (A and B), and PFS (C and B) analysis of the groups stratified by the MIPI and MIPI-c.

**Supplementary Figure S7. Survival rates of the validation cohort.** The OS and PFS are shown in overall (A and B) and age-defined manners (C and D).

# Supplementary Figure S1

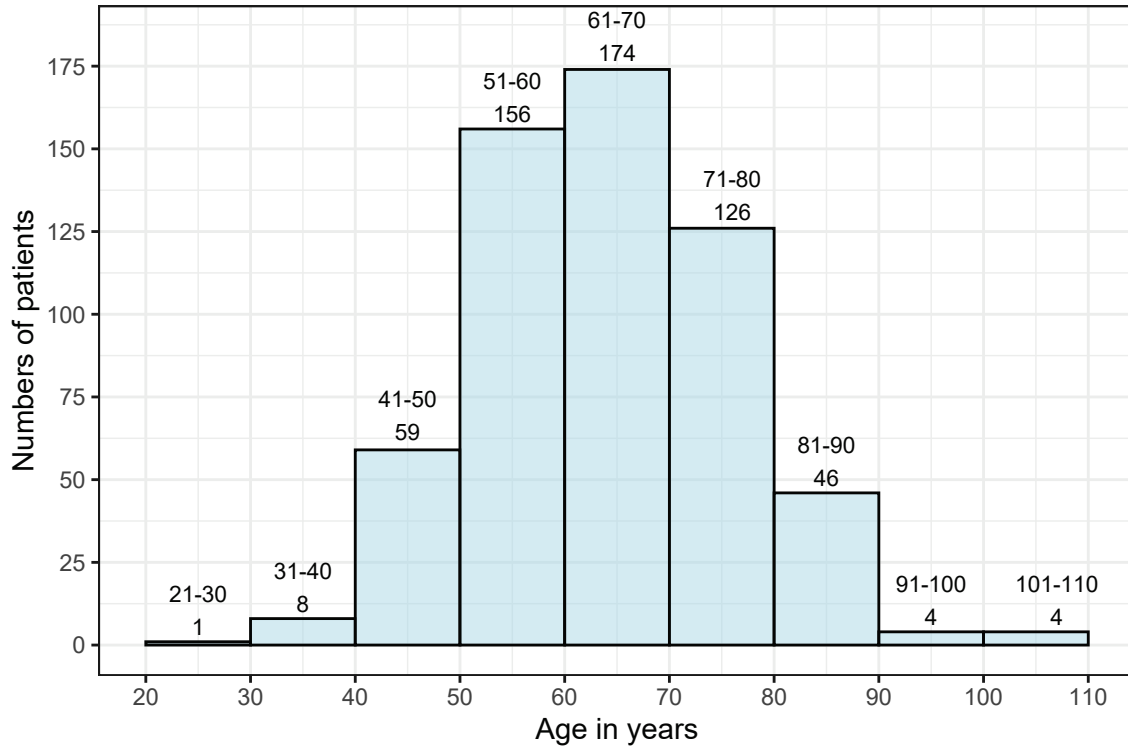

# Supplementary Figure S2

**A**

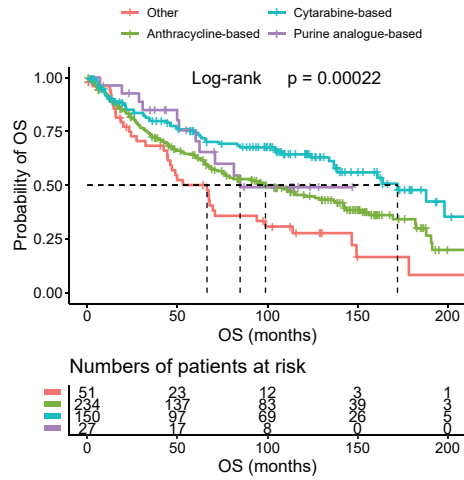

**B**

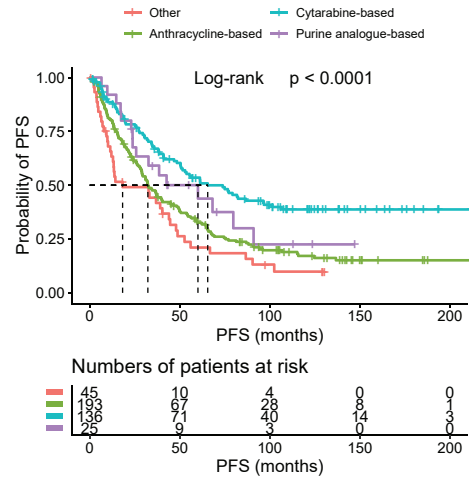

**C**

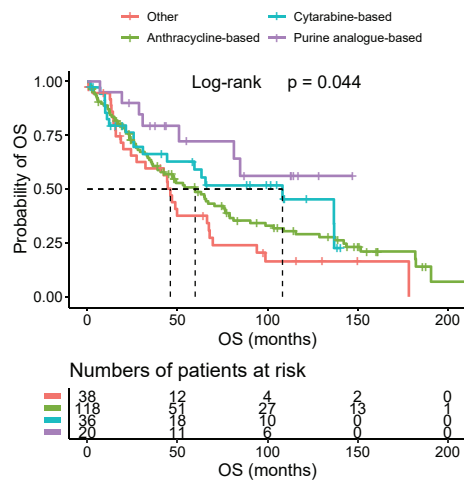

**D**

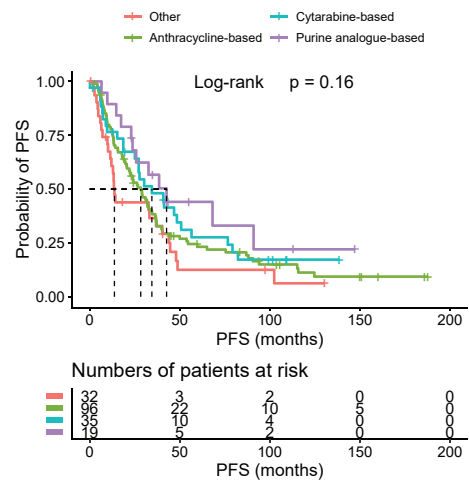

**E**

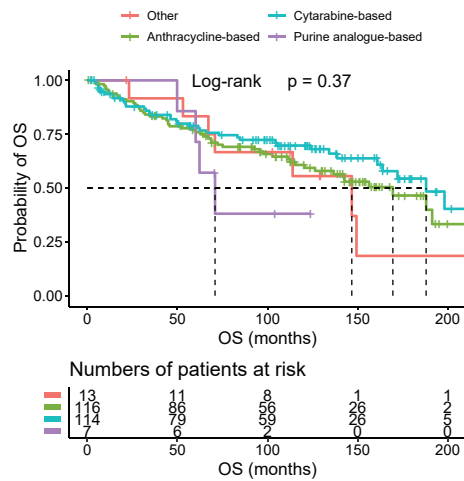

**F**

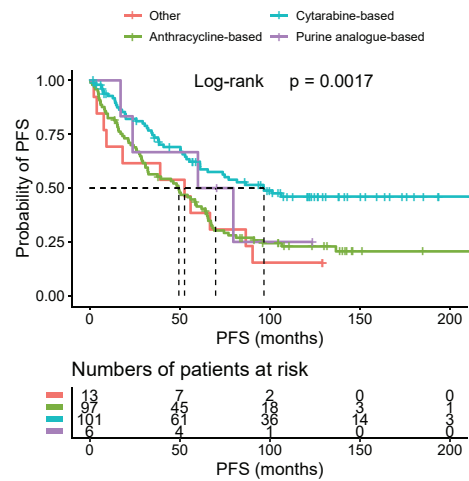

# Supplementary Figure S3

**A**

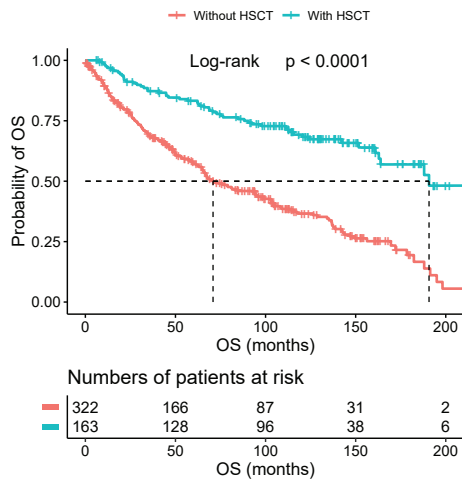

**B**

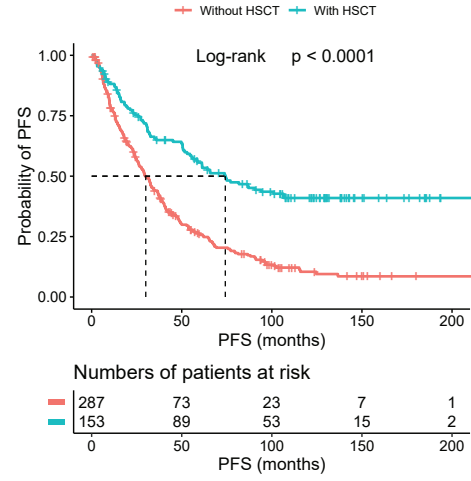

**C**

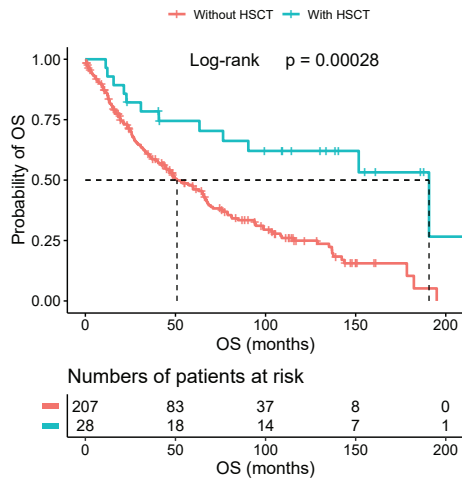

**D**

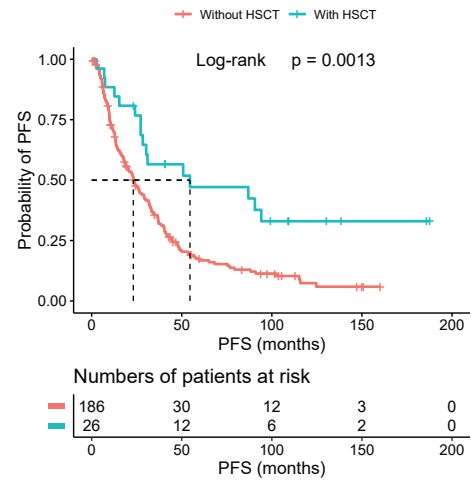

**E**

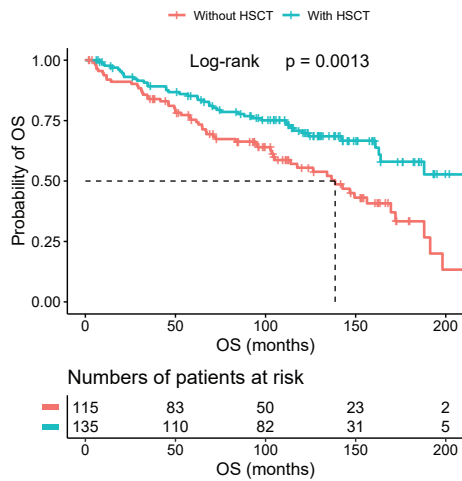

**F**

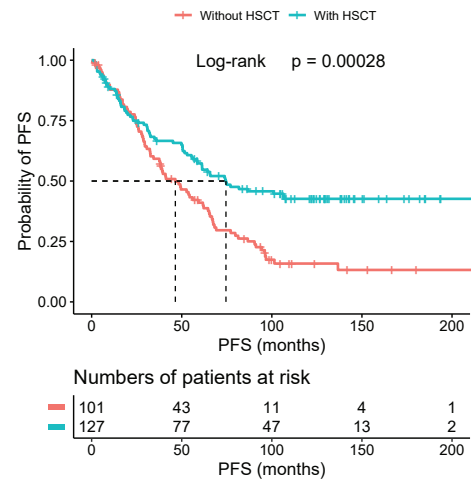

# Supplementary Figure S4

**A**

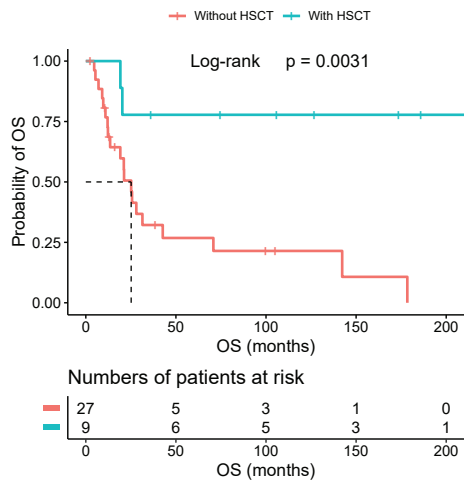

**B**

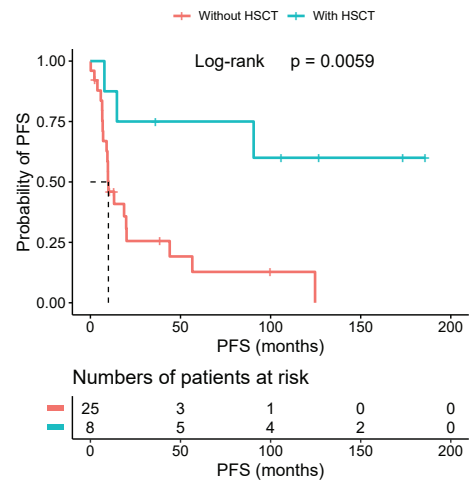

# Supplementary Figure S5

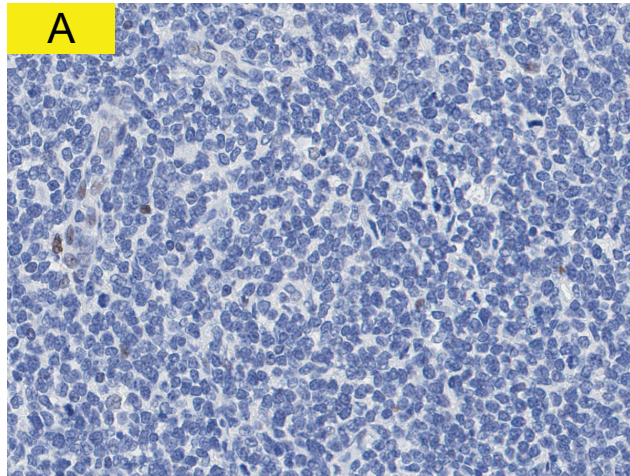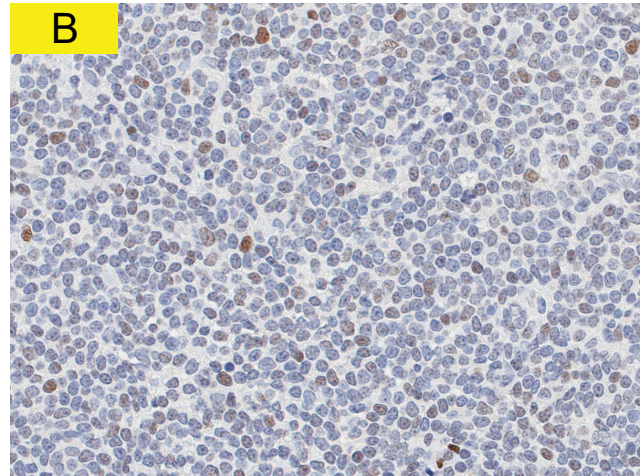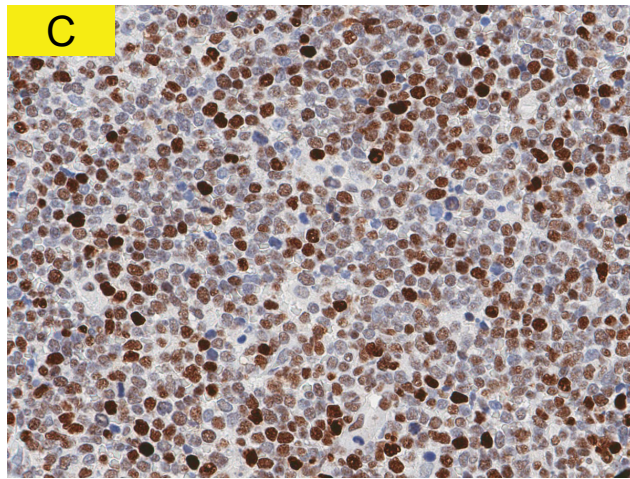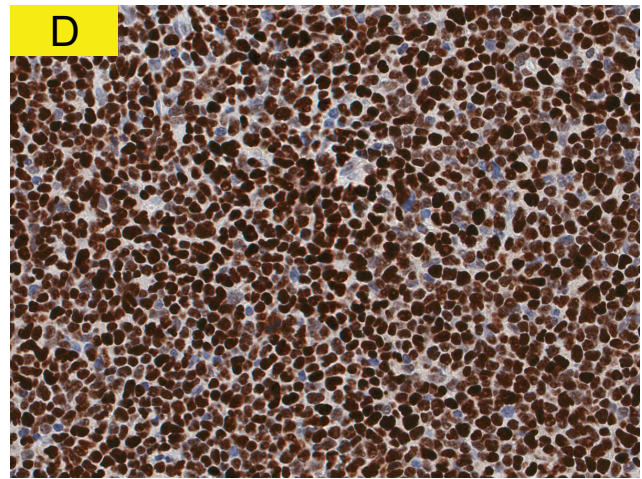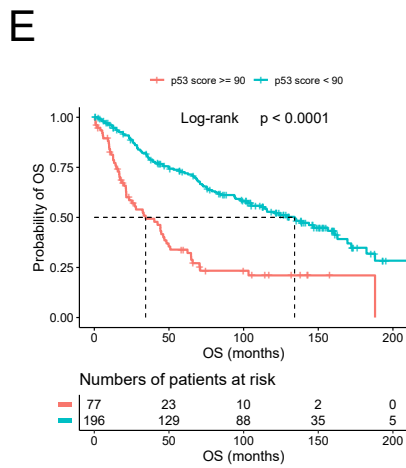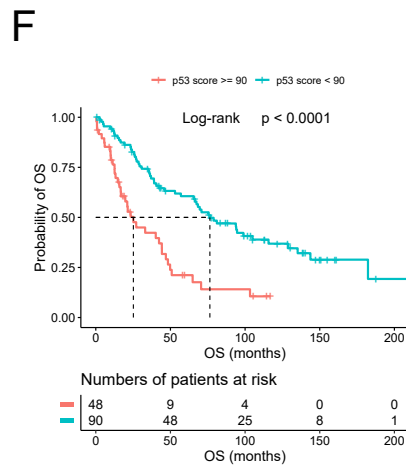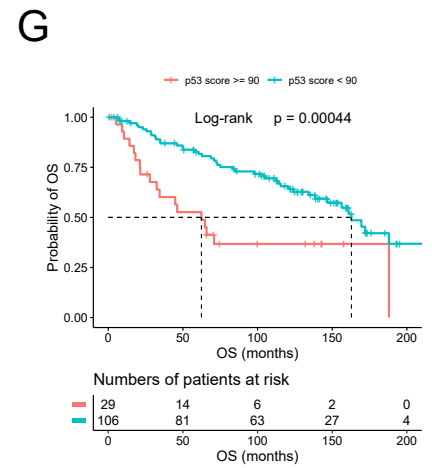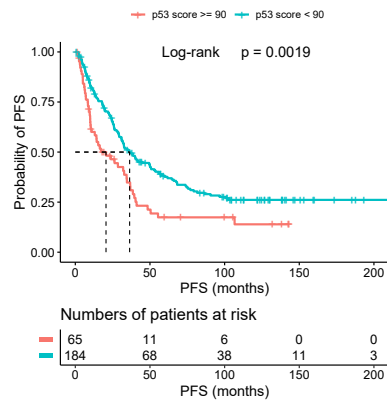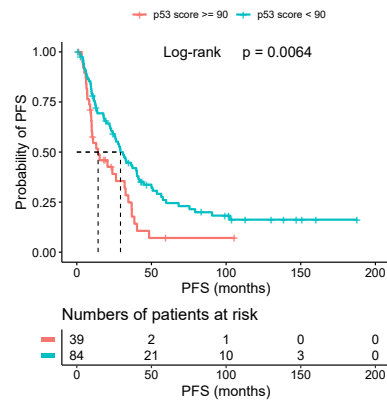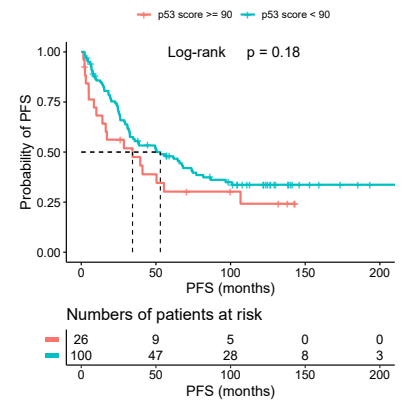



# Supplementary Figure S6

**A**

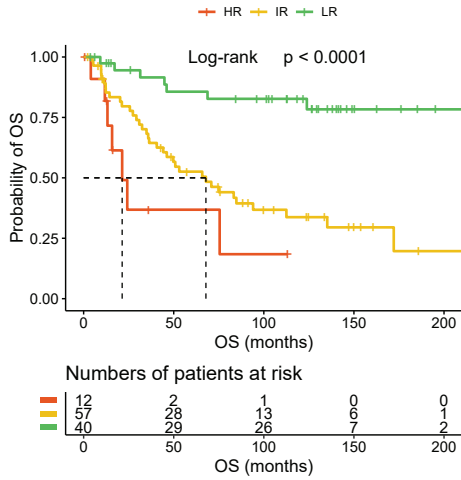

**B**

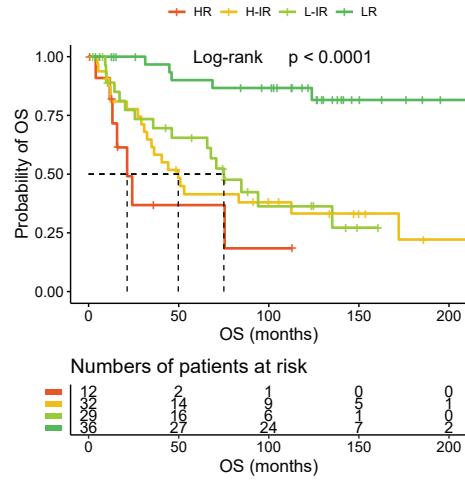

**C**

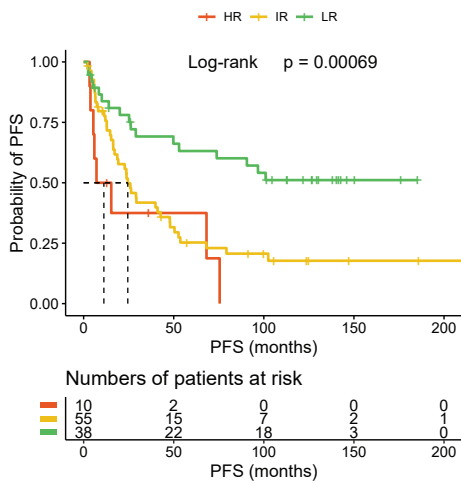

**D**

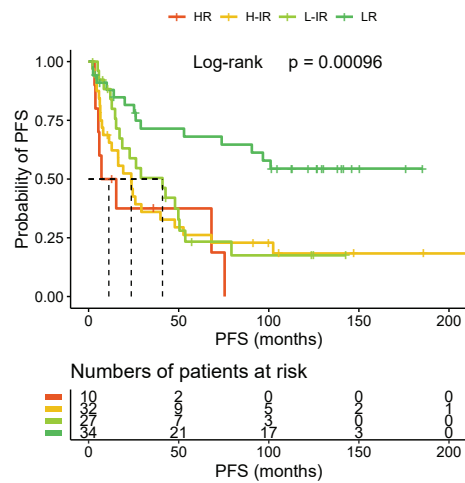

# Supplementary Figure S7

**A**

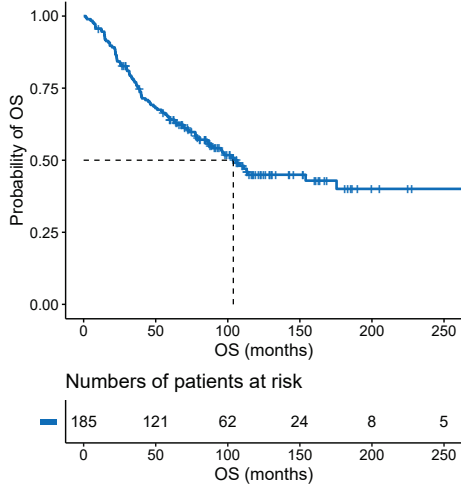

**B**

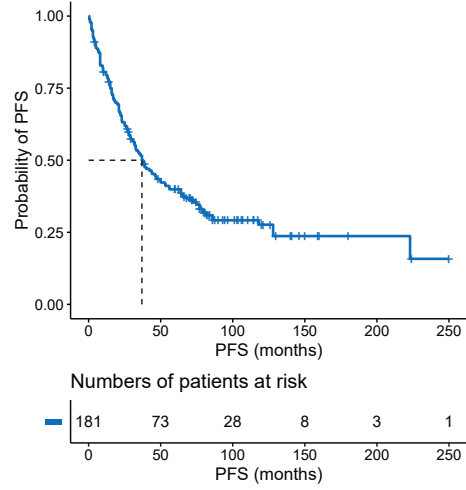

**C**

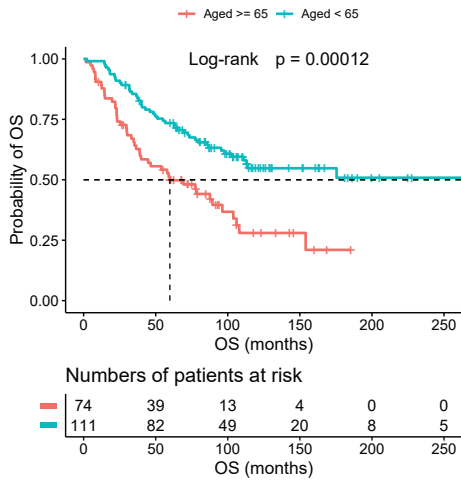

**D**

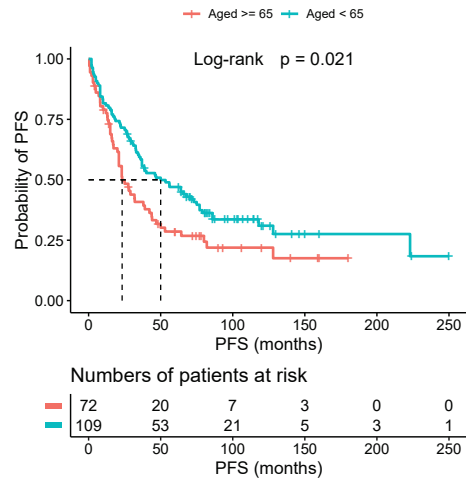

Supplement: 13045_2023_1520_MOESM1_ESM.pdf [file 13045_2023_1520_MOESM1_ESM.pdf]
